# Supplementary material for: In situ microenvironment remodeling using a dual-responsive system: photodegradable hydrogels and gene activation by visible light
Source: Royal Society of Chemistry journal article supplement (doi:10.1039/d2bm00617k), 2022-01-01
Supplement: d2bm00617k1.pdf [file d2bm00617k1.pdf]

## Supporting Information

*In situ* microenvironment remodeling using a dual-responsive system

Eunjee A. Lee, Seoyeon Kim, Yoonhee Jin, Seungwoo Cho, Kisuk Yang, Nathaniel S. Hwang,  
and Hwan D. Kim

### Supplemental Figures

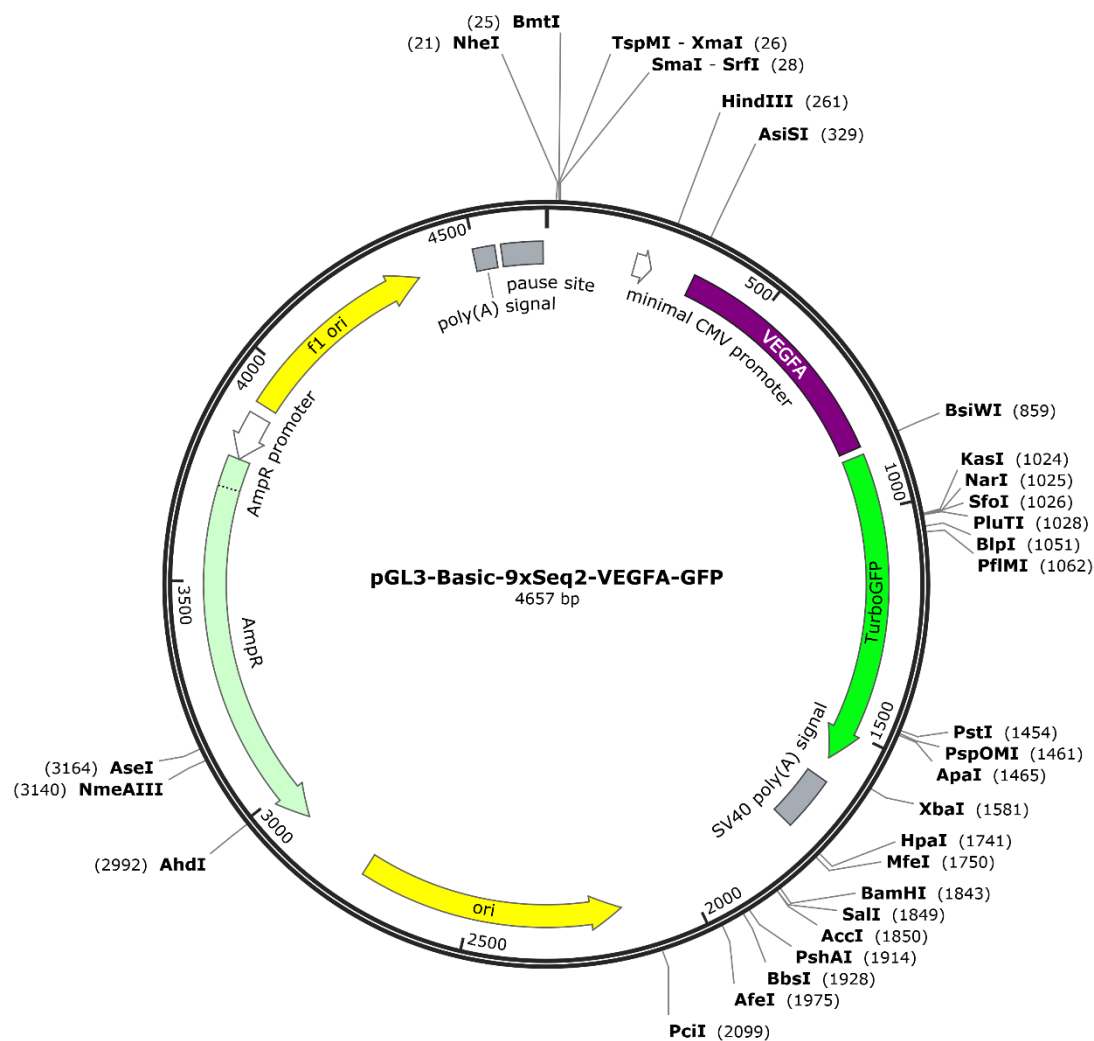

**Supplementary Figure 1** Schematic Composition of pGL3-Basic-9xSeq2-VEGFA-GFP

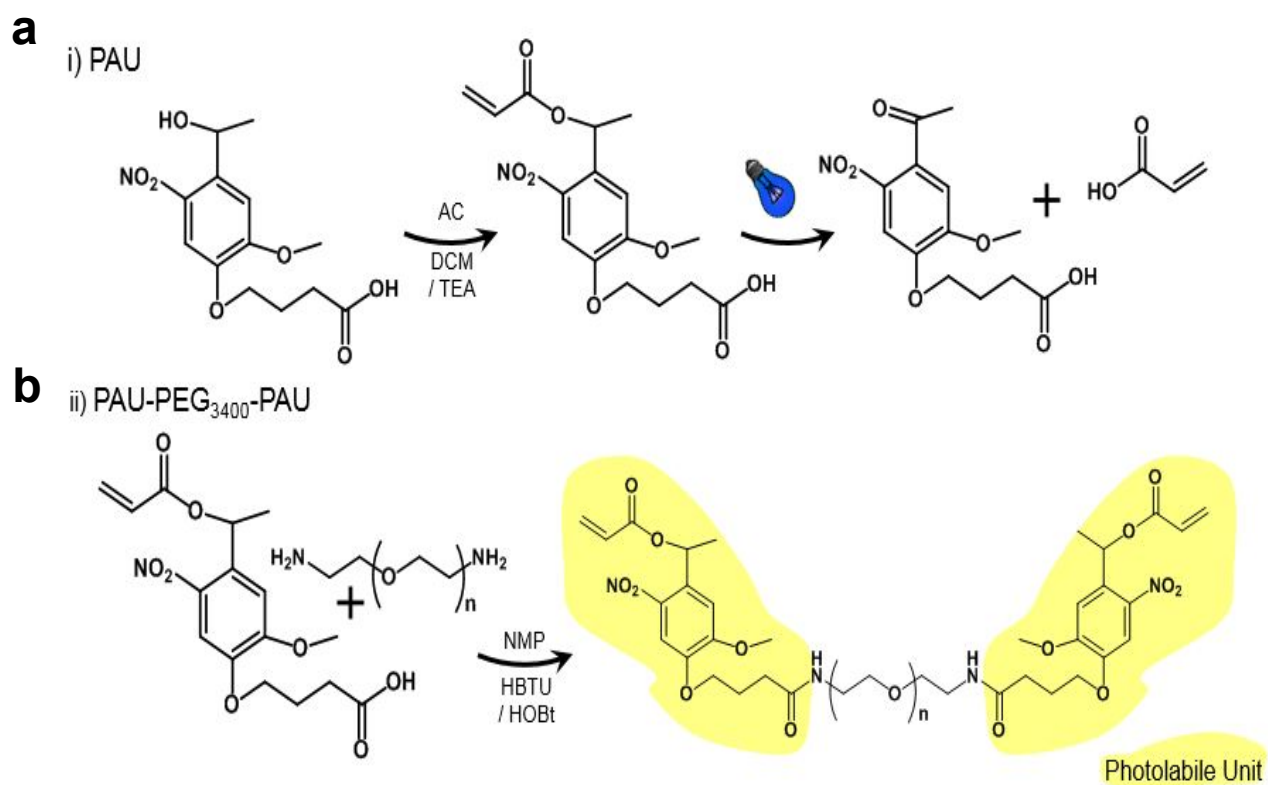

**Supplementary Figure 2** Schematic illustration of (a) synthesis of photocleavable acrylate unit (PAU) and (b) its conjugation to PEG-bis-amine (PAU-PEG<sub>3400</sub>-PAU) polymer chain, with photolabile units highlighted in yellow.

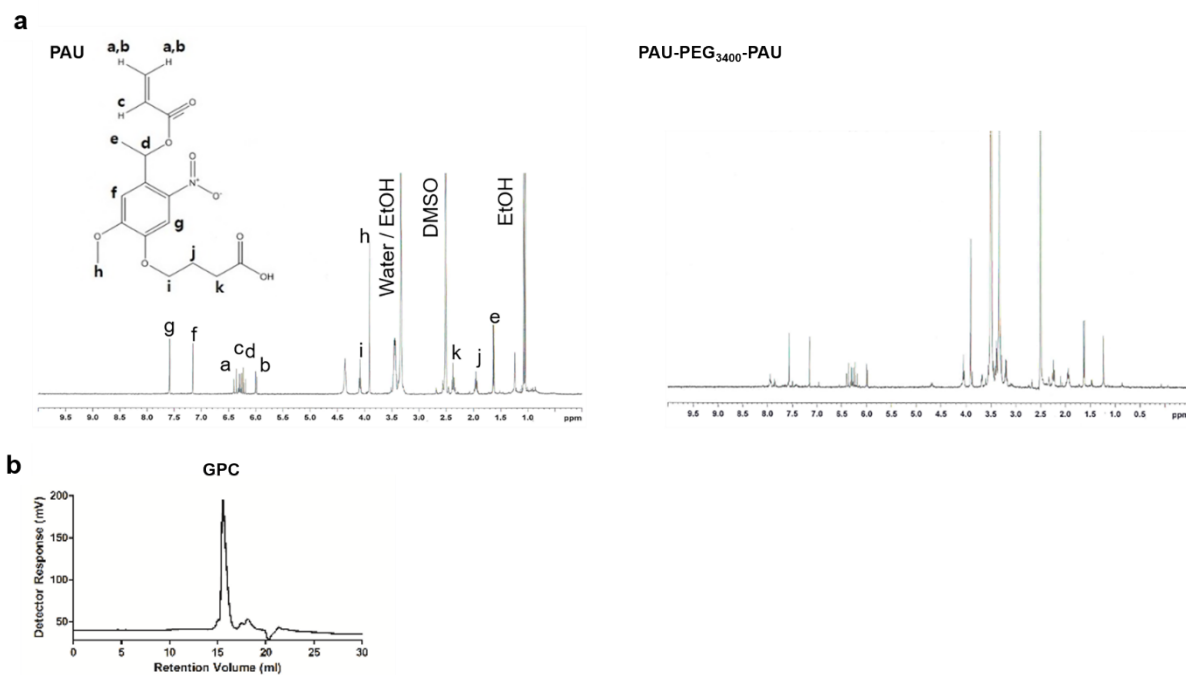

**Supplementary Figure 3** (a)  $^1\text{H}$ -NMR spectra of modified PAU and PAU-conjugated PEG polymer (PAU-PEG<sub>3400</sub>-PAU) chain and (b) gel permeation chromatogram of PAU-PEG<sub>3400</sub>-PAU synthesized *via* HBTU-mediated 1-hydroxy benzotriazole (HOBt) conjugate addition.

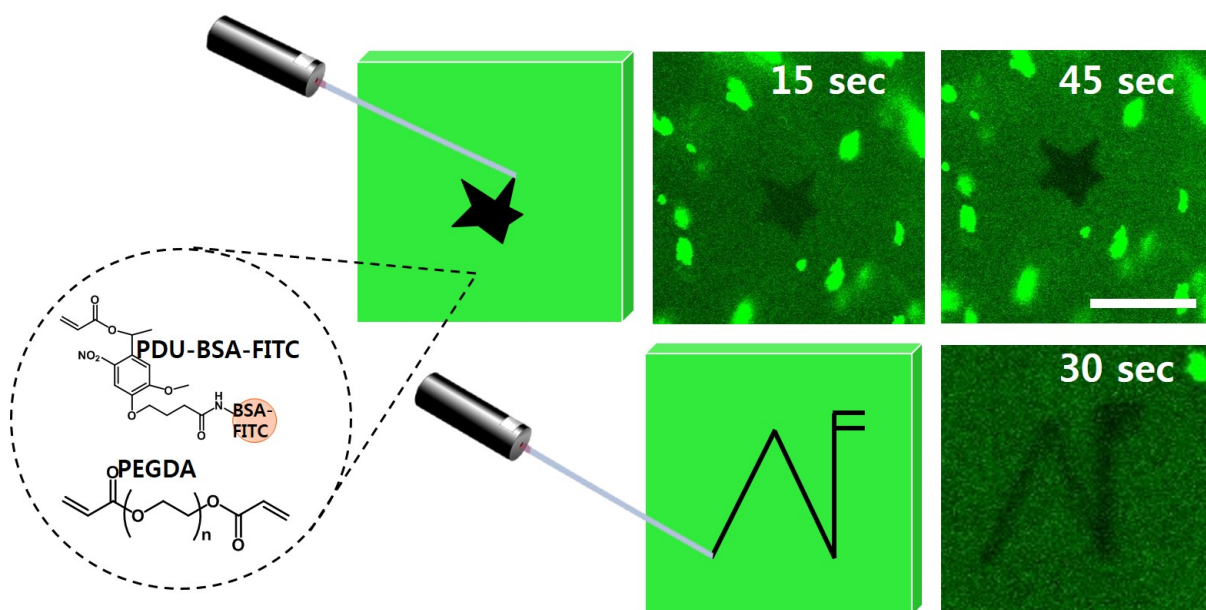

**Supplementary Figure 4** Owing to light irradiation through the laser, fluorescence does not appear at 15, 30, and 45 s in the star or university logo shape in the middle of the photogel, which was synthesized using PDU-BSA-FITC units. Scale bar = 0.5 mm.

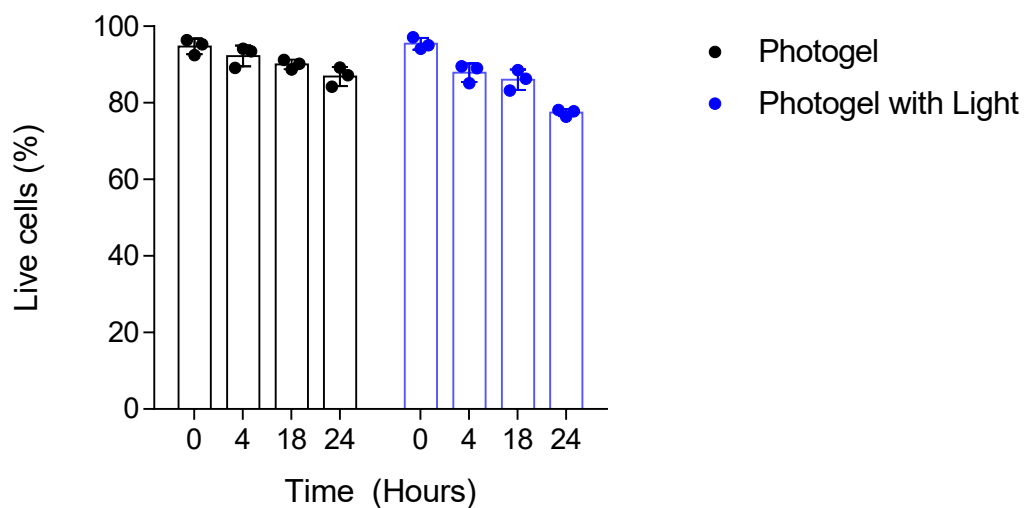

**Supplementary Figure 5** Cell viability at different time points (0, 4, 18, and 24 h) in photogel before and after light exposure. Data represent means  $\pm$  S.D. ( $n = 3$  per group). n.s: not significant,  $*p < 0.05$ ,  $**p < 0.01$ ,  $***p < 0.001$ , and  $****p < 0.0001$
